# **Evidence for Miocene overwater colonization in Caribbean *Cyrtognatha* spiders**

\*Klemen Čandek<sup>1</sup>, Ingi Agnarsson<sup>2,4</sup>, Greta Binford<sup>3</sup>, Matjaž Kuntner<sup>1,4,5,6</sup>

<sup>1</sup> Evolutionary Zoology Laboratory, Institute of Biology, Scientific Research Centre, Slovenian Academy of Sciences and Arts, Ljubljana, Slovenia

<sup>2</sup> Department of Biology, University of Vermont, Burlington, VT, USA

<sup>3</sup> Department of Biology, Lewis and Clark College, Portland, OR, USA

<sup>4</sup> Department of Entomology, National Museum of Natural History, Smithsonian Institution, Washington D.C., USA

<sup>5</sup> College of Life Sciences, Hubei University, Wuhan, Hubei, China

<sup>6</sup> Evolutionary Zoology Laboratory, Department of Organisms and Ecosystems Research, National Institute of Biology, Ljubljana, Slovenia

## **Abstract**

Island systems provide excellent arenas to test evolutionary hypotheses pertaining to gene flow and diversification of dispersal-limited organisms. Here we focus on an orbweaver spider genus *Cyrtognatha* (Tetragnathidae) from the Caribbean, with the aims to reconstruct its evolutionary history, describe its biogeographic history in the archipelago, and to estimate the timing and route of Caribbean colonization. Specifically, we test if *Cyrtognatha* biogeographic history is consistent with an ancient vicariant scenario (the GAARlandia landbridge hypothesis) or overwater dispersal. We reconstructed a species level phylogeny based on one mitochondrial (CO1) and one nuclear (28S) marker. We then used this topology to constrain a time-calibrated mtDNA phylogeny, for subsequent biogeographical analyses of over 100 originally sampled *Cyrtognatha* individuals. Our results suggest a monophyletic radiation of Caribbean *Cyrtognatha*, containing 11 to 14 species that are exclusively single island endemics. Our analyses refute vicariance and instead support an overwater colonization to the Caribbean in mid-Miocene. Having colonized Hispaniola first, *Cyrtognatha* subsequently dispersed to, and diversified on, the other islands of the Greater, and Lesser Antilles.

## **Introduction**

Island biogeography is concerned with colonization and diversification of organisms on islands, including empirical tests of evolutionary hypotheses pertaining to gene flow in dispersal-limited organisms<sup>1,2</sup>. Islands are geographically widespread and diverse, and vary in shapes and sizes, age and geologic origins, and show different degrees of isolation<sup>3</sup>. Darwin already recognized that this combination of attributes makes islands appealing objects of scientific study<sup>4</sup>. Modern biogeography recognizes the interplay among island histories, the specifics of their geography, and various attributes of organisms that inhabit them<sup>5</sup>.

Amongst island systems some of the best studied in terms of biogeographic research are Hawaii<sup>6–8</sup>, Galapagos<sup>9–11</sup>, Azores<sup>12–14</sup>, Canary<sup>15–17</sup> and Solomon<sup>18–20</sup> islands, as well as large continental fragments such as Madagascar<sup>21–23</sup> and New Zealand<sup>24–26</sup>. However, the Caribbean island system<sup>27–30</sup> is the single most ‘published’ island system in biogeography literature (Google Scholar title hits 237 compared with 195 for the second, New Zealand). The Caribbean Basin, also known as West Indies, lies in the tropical zone between South and North American continents, and to the east of the Gulf of Mexico. Combining over 700 islands, the Caribbean is considered among the world’s biodiversity

hotspots<sup>31–33</sup>. In its most broad categorization, the Caribbean comprises three regions: (1) Greater Antilles with the largest islands of Cuba, Hispaniola (Dominican Republic and Haiti), Puerto Rico and Jamaica representing 90% of all land in Caribbean Sea; (2) Lesser Antilles with numerous smaller, mostly volcanic, islands and (3) the Lucayan platform archipelago (the Bahamas).

The Greater Antillean islands of Cuba, Hispaniola, and Puerto Rico, but not Jamaica, are parts of the old proto-Antillean arc that began its formation in the distant past, over 130 million years ago (MYA). Through Caribbean plate tectonics, the proto-Antillean arc drifted eastward until settling at its current location around 58 MYA<sup>34,35</sup>. Researchers disagree on the timing of the proto-Antillean arc connection with South or North America in the Cretaceous or even on the existence of such a connection. However, that distant past may have had little biological relevance for current biotas due to a catastrophic effect of the bolide that crashed into Yucatan around 65 MYA which arthropods would likely not have survived<sup>36–38</sup>. The emergence of the Greater Antilles as relevant biogeographic units is therefore more recent. Various studies estimate that earliest contiguous permanent dry land on the Greater Antilles has existed since the middle Eocene, approximately 40 MYA<sup>38–42</sup>.

Although it may be possible that the Greater Antilles have remained isolated from continental landmasses since the early Cenozoic, a hypothesized land bridge potentially existed around 35–33 MYA<sup>38,43</sup>. This land bridge, known as GAARlandia (Greater Antilles – Aves Ridge), is hypothesized to have connected the Greater Antilles with the South American continent for about 2 million years, due to a sea level drop and subsequent exposure of land at Aves Ridge. As a means of biotic evolution on the Greater Antilles, the GAARlandia hypothesis allows for a combination of overland dispersal and subsequent vicariance and can be tested with the help of time calibrated phylogenies and fossils. While patterns of relationships that are consistent with predictions based on GAARlandia have been found in some lineages<sup>44–48</sup> it is not a good model for explaining the biogeographical history of others<sup>27,29,49,50</sup>.

Among the islands forming the Greater Antilles, Jamaica is a geological special case since it was originally a part of the Central American tectonic plate. Jamaica emerged as an island around 40 MYA but remained partially or fully submerged until its reemergence in mid Miocene around 15 MYA<sup>30,51–53</sup>, and was never part of the hypothetical GAARlandia landbridge. Consequently, Jamaica's biota is distinct from other regions of Greater Antilles<sup>54</sup>.

The Lesser Antilles formed more recently. Northward of Guadalupe they split into two arches of distinct origins. The older, outer arc formed volcanically in Eocene-Oligocene, but its islands are largely composed of limestone and have undergone orogenic uplift since the Miocene. The Lesser Antilles' inner arc is of more recent volcanic origin (<10 MYA) and its islands continue to be formed<sup>55–59</sup>. With no history of continental connection, most of the Lesser Antilles have been completely isolated for at least a few million years, and thus their biotas must have originated via overwater dispersal<sup>30,60,61</sup>.

Spiders and other arachnids are emerging as model organisms for researching biogeography of the Caribbean<sup>27,44,48,62–64</sup>. Spiders are globally distributed and hyperdiverse (~47,000 described of roughly 100,000 estimated species<sup>65,66</sup>) organisms that vary greatly in size, morphology and behavior, habitat specificity, and importantly, in their dispersal biology<sup>67–69</sup>. While some spiders show good active dispersal<sup>70</sup>, others are limited in their cursorial activities but exhibit varying passive dispersal potential. Many species are able to passively drift on air currents with behavior called ballooning<sup>67,71</sup> to colonize new areas. Some genera of spiders, like *Tetragnatha* or *Nephila* are known to easily cross geographic barriers, disperse large distances, and are one of the first colonizers of newly formed islands<sup>72–74</sup>. These are considered to be excellent aerial dispersers, while other lineages are not as

successful. For example, the primitively segmented spiders, family Liphistiidae and the mygalomorph trapdoor spiders, likely do not balloon and have highly sedentary lifestyle imposing strict limits on their dispersal potential. As a consequence, bodies of sea water or even rivers represent barriers that limit their gene flow, which leads to micro-allopatric speciation<sup>75–80</sup>. Unlike the above clear-cut examples, the dispersal biology of most spider lineages is unknown, and their biogeographic patterns poorly understood.

This research focuses on the tetragnathid spider genus *Cyrtognatha* and its biogeography in the Caribbean. *Cyrtognatha* is distributed from Argentina to southern Mexico and the Caribbean<sup>65,81</sup>. A recent revision recognized 21 species of *Cyrtognatha* but cautioned that only a fraction of its diversity is known<sup>82</sup>. Its biology is poorly understood as these spiders are rarely collected and studied (a single Google scholar title hit vs 187 title hits for *Tetragnatha*). Considering their phylogenetic proximity to *Tetragnatha*, as well as its described web architecture, it seems likely that *Cyrtognatha* species disperse by ballooning<sup>83–85</sup>. Through an intensive inventory of Caribbean arachnids, we obtained a rich original sample of *Cyrtognatha* that allows for the first reconstruction of their biogeographic history in the Caribbean. We use molecular phylogenies to reconstruct *Cyrtognatha* evolutionary history with particular reference to the Caribbean, and compare estimates of clade ages with geological history of the islands. We use this combined evidence to test the vicariant versus dispersal explanations of Caribbean colonization, and to look for a broad agreement of *Cyrtognatha* biogeographic patterns with the GAARlandia landbridge hypothesis. We also greatly expand understanding of *Cyrtognatha* diversity in the Caribbean region.

## Materials and Methods

### Sampling and identification

Material for our research was collected as a part of a large-scale Caribbean Biogeography (CarBio) project. Extensive sampling was conducted across Caribbean islands, using visual aerial search (day and night), and beating<sup>66,86</sup>. Collected material was fixed in 96 % ethanol and stored at -20/-80 °C until DNA extraction. Species identification was often impossible due to juvenile individuals or lack of match with the described species (Table 1).

### Molecular procedures

DNA isolation took place at University of Vermont (Vermont, USA; UVM) using QIAGEN DNeasy Tissue Kit (Qiagen, Inc., Valencia, CA), at the Smithsonian Institute in Washington, DC using an Autogenprep965 for an automated phenol chloroform extraction, and at EZ Lab (Ljubljana, Slovenia). The latter protocol involved robotic DNA extraction using Mag MAX™ Express magnetic particle processor Type 700 with DNA Multisample kit (Applied Biosystems, Foster City, CA, USA) and following modified protocols (Vidregar, Toplak & Kuntner, 2014).

We targeted two genetic markers: (1) the standard Cytochrome C oxidase subunit 1 (CO1) barcoding region, which has repeatedly been shown to be taxonomically informative in species delimitation<sup>87,88</sup>; and (2) the nuclear 28S gene for a subset of terminals representing all sampled species. We used the forward LCO1490 (GGTCAACAAATCATAAAGATATTGG)<sup>89</sup> and the reverse C1-N-2776 (GGATAATCAGAATATCGTCGAGG)<sup>90</sup> for CO1 amplification. The standard reaction volume was 25 µL containing 5 µL of Promega's GoTaq Flexi Buffer and 0.15 µL of GoTaq Flexi Polymerase, 0.5 µL dNTP's (2 mM each, Biotools), 2.3 µL MgCl<sub>2</sub> (25 mM, Promega), 0.5 µL of each primer (20 µM), 0.15 µL BSA (10 mg/mL; Promega), 2 µL DNA template and the rest was sterile distilled water. We used

the following PCR cycling protocol: an initial denaturation step of 5 min at 94 °C followed by 20 touch-up method cycles of 60 s at 94°C, 90 s at 44 °C → 54 °C, 1 min at 72 °C, followed by 15 cycles of 90 s at 94 °C, 90 s at 53.5 °C, 60 s at 72 °C and the final extension period of 7 min at 72 °C.

The primer pair for 28S were the forward 28Sa (also known as 28S-D3A; GACCCGCTTGAAACACGGA)<sup>91</sup> and the reverse 28S-rD5b (CCACAGCGCCAGTTCTGCTTAC)<sup>92</sup>. The standard reaction volume was 35 µL containing 7.1 µL of Promega's GoTaq Flexi Buffer and 0.2 µL of GoTaq Flexi Polymerase, 2.9 µL dNTP's (2 mM each, Biotools), 3.2 µL MgCl<sub>2</sub> (25 mM, Promega), 0.7 µL of each primer (20 µM), 0.2 µL BSA (10 mg/mL; Promega), 1 µL DNA template and the rest was sterile distilled water. We used the following PCR cycling protocol: an initial denaturation step of 7 min at 96 °C followed by 20 touch-down method cycles of 45 s at 96 °C, 45 s at 62 °C → 52 °C, 60 s at 72 °C, followed by 15 cycles of 45 s at 96 °C, 45 s at 52 °C, 60 s at 72 °C and the final extension period of 10 min at 72 °C. The PCR products were purified and sequenced at MacroGen (Amsterdam, NL).

We used Geneious v. 5.6.7<sup>93</sup> for sequence assembly, editing and proofreading. For alignment, we used the default settings and the automatic optimization option in the online version of MAFFT<sup>94</sup>. We concatenated the CO1 and 28S matrices in Mesquite<sup>95</sup>.

We obtained 103 original *Cyrtognatha* CO1 sequences and mined four additional *Cyrtognatha* CO1 sequences from GenBank (Table 1). Moreover, we added three CO1 sequences from GenBank (*Arkys cornutus*, *Metellina menzei*, *Pachygnatha degeeri*) and three original CO1 sequences (*Leucauge argyra*, *Chrysometa linguiformis*, *Tetragnatha elongata*) to be used as outgroups. We obtained 22 original sequences of 28S gene fragment representing all putative species of *Cyrtognatha* and included one from GenBank. Additionally, we incorporated three original 28S sequences (*Leucauge argyra*, *Chrysometa linguiformis*, *Tetragnatha elongata*) and a single one from GenBank (*Arkys cornutus*) to be used as outgroups (Table 1). The concatenated matrix contained 1244 nucleotides (663 for CO1 and 581 for 28S).

## Species delimitation

Because the current taxonomy of *Cyrtognatha* based on morphology is highly incomplete<sup>82</sup>, we undertook species delimitation using CO1 data. To determine the molecular taxonomic operational units (MOTUs), we used four different species delimitation methods, each with its online application: PTP (Poisson tree process)<sup>96</sup>, mPTP (multi-rate Poisson tree process)<sup>97</sup>, GMYC (generalized mixed yule coalescent)<sup>98</sup> and ABGD (automatic barcode gap discovery)<sup>99</sup>. We ran these species delimitation analyses using the default settings, with the input tree for GMYC from BEAST2<sup>100</sup> and the input trees for PTP and mPTP from MEGA 6.0<sup>101</sup>.

## Phylogenetic analyses

We used MrBayes<sup>102</sup> to reconstruct an all-terminal phylogeny for a complete set of our original *Cyrtognatha* material and outgroups using CO1 (Table 1). For Bayesian analysis we used the Generalised time-reversible model with gamma distribution and invariant sites (GTR+G+I) as suggested by AIC and BIC criterion in jModelTest2<sup>103</sup>. We ran two independent runs, each with four MCMC chains, for 100 million generations, with a sampling frequency of 1000 and relative burn-in set to 25%. The starting tree was random.

For a species level phylogeny, we then selected two individuals per MOTU and added 28S sequence data for two partitions and analyzed this concatenated dataset under a Bayesian framework. As above, jModelTest2 suggested GTR+G+I as the appropriate model, this time for both partitions. These analyses had 28 terminals including outgroups (Table 1). The settings in MrBayes were as

above, but the number of MCMC generations was set to 30 million. Due to high mutation rates in noncoding parts of nuclear genes like 28S, insertions and deletions accumulate through evolution<sup>104,105</sup>, resulting in numerous gaps in a sequence alignment. We treated gaps as missing data but also ran additional analyses applying simple gap coding with FastGap<sup>106</sup>.

## Molecular dating analyses

We used BEAST2<sup>100</sup> for time calibrated phylogeny reconstruction (chronogram). We used a single CO1 sequence per MOTU and trimmed the sequences to approximately equal lengths. We then modified the xml file in BEAUti<sup>100</sup> to run three different analyses. The first analysis was run using GTR+G+I as suggested by jModelTest2. The second analysis employed the package and model bModelTest<sup>107</sup>. The third analysis used the package and RBS model<sup>108</sup>. All parameters were set to be estimated by BEAST. We calibrated a relaxed log normal clock following Bidegaray-Batista and Arnedo<sup>109</sup> with the ucl.mean set as normal distribution with mean value of 0.0112 and standard deviation of 0.001, and the ucl.stdev set to exponential distribution with the mean of 0.666. We ran an additional analysis using a fossil calibration point on the basal node of Caribbean *Cyrtognatha* clade. *Cyrtognatha weitschati*, known from Dominican amber of Hispaniola, is hypothesized to be 13.65 – 20.41 million years old. We used an exponential prior with 95 % confidence interval spanning from a hard lower bound at 13.65 MYA to the soft upper bound at 41 MYA. This upper bound corresponds with the time of Hispaniola appearance. We selected Yule process as a tree prior and constrained the entire topology for BEAST analyses based on the results from the above described species level phylogeny. The trees were summarized with TreeAnnotator<sup>100</sup>, with 20% burn-in based on a Tracer<sup>110</sup> analysis, target tree set as Maximum clade credibility tree and node heights as median heights.

All metafiles from BEAST and MrBayes were evaluated in Tracer to determine burn-in, to examine ESS values and to check for chain convergence. For visualization of trees we used FigTree<sup>111</sup>. All MrBayes and BEAST analyses were run on CIPRES portal<sup>112</sup>.

## Ancestral area estimation

We used BioGeoBEARS<sup>113</sup> in R version 3.5.0<sup>114</sup> to estimate ancestral range of *Cyrtognatha* in the Caribbean. We used a BEAST produced ultrametric tree from the above described molecular dating analysis as an input. We removed the outgroup *Tetragnatha elongata* and conducted the analyses with the 13 *Cyrtognatha* MOTUs from six areas (Hispaniola, Jamaica, Puerto Rico, Cuba, Lesser Antilles and Panama). We estimated the ancestral range of species with all models implemented in BioGeoBEARS: DEC (+J), DIVALIKE (+J) and BAYAREALIKE (+J). We used log-likelihoods (LnL) with Akaike information criterion (AIC) and sample-size corrected AIC (AICc) scores to test each model's suitability for our data. All of our *Cyrtognatha*'s MOTUs are single island endemics, therefore we were able to reduce the parameter "max\_range\_size" to two<sup>29,115,116</sup>.

## Results

We collected 103 *Cyrtognatha* individuals from Cuba, Jamaica, Dominican Republic/Hispaniola, Puerto Rico and Lesser Antilles (Fig. 1, Table 1). We confirmed that all individuals are morphologically *Cyrtognatha*. Most species are undescribed but we identified two known species: *C. espanola* (Bryant, 1945) and *C. elyunquensis* (Petrunkovitch, 1930) comb. nov., previously placed in *Tetragnatha*<sup>65</sup>.



We obtained CO1 sequences for all *Cyrtognatha* individuals. Using computational methods for species delimitation our *Cyrtognatha* dataset is estimated to contain from 11 to 14 MOTUs (Supplementary Note S1). The results from PTP, mPTP and ABGD were mostly consistent, disagreeing only on the status of three putative species. To these species that are supported by some but not all analyses, we added the label B or C after the species name: *Cyrtognatha* SP10B, *Cyrtognatha* SP2B and *Cyrtognatha* SP2C. On the other hand, we dismiss the results from GMYC analyses using either a single versus multiple threshold option, which failed to recover reliable MOTUs. The composition of our dataset is most likely not compatible with GMYC method as it cannot detect switches between inter- and intraspecific branching patterns, offering us from 1 to 39 MOTUs.

The two gene and the CO1 phylogenies yielded nearly identical networks for the Caribbean taxa, but strikingly different phylogenies due to different root placement (Fig. 2, Supplementary Fig. S1). Therefore, we ran an additional analysis constraining the root of the mtDNA phylogeny to reflect that of the two gene phylogeny, with otherwise the same settings (Fig. 1, Supplementary Fig. S2). Our unconstrained all-terminal Bayesian phylogeny supports Caribbean *Cyrtognatha* monophyly, albeit with only three non-Caribbean samples. Most terminal clades were well supported with lower supports for some deeper nodes (Supplementary Fig. S1). This phylogeny strongly recovers all putative species groups as single island endemics. Furthermore, all geographic areas harbor monophyletic lineages, with the exception of Hispaniola that supports two independent clades. The unconstrained all-terminal CO1 phylogeny recovers the Lesser Antillean clade as sister to all other Caribbean taxa. However, this relationship is not recapitulated in the concatenated, species level, phylogeny (Fig. 2, Supplementary Fig. S3). The concatenated phylogeny also supports monophyly of the Caribbean taxa but recovers the clade of *C. espanola* and *C. SP12* from Hispaniola as sister to all other Caribbean *Cyrtognatha*. The species level phylogeny is generally better supported, with the exception of a clade uniting species from Lesser Antilles, Cuba, Hispaniola and Puerto Rico. In both Bayesian analyses the chains successfully converged and ESS as well as PRSF values of summarized MCMC runs parameters were appropriate<sup>102</sup>.

Chronograms produced by BEAST, using either exclusively CO1 mutation rate or incorporating the additional fossil for time calibration, exhibited very similar time estimates (Fig. 3, Supplementary Fig. S5). We decided to proceed with the mutation rate-only calibrated phylogeny for further analyses because it is less likely to contain known potential biases when calibrating with scarcely available fossils and geological information<sup>117,118</sup>. The molecular dating analyses based on the three different models in BEAST largely agreed on node ages with less than 1 million years variation. However, the log files from the chronogram based on GTR+G+I model consistently exhibited low ESS values (<50), even with MCMC number of generations having been increased to 200 million. The analyses using the remaining models, RBS and bModelTest, were more appropriate since MCMC chains successfully converged, and the lowest ESS values were 981 and 2214 respectively, thus far exceeding the suggested 200. Additional examination of the log files produced by bModelTest phylogeny with bModelAnalyzer from AppStore.exe<sup>107</sup> revealed that MCMC chains spent most time in modified TN93 model with the code 123143 which contributed for 49.56% of posterior probability (for details on bModelTest method of model selection see <sup>107</sup>). The BEAST chronogram using bModelTest (Fig. 3, Supplementary Fig. S4) yielded the best supported results, amongst the above mentioned approaches, based on ESS values, and was therefore used in subsequent biogeographical analyses. This chronogram (Fig. 3) supports a scenario in which *Cyrtognatha* diverged from its sister genus *Tetragnatha* at 18.7 MYA (95% HDP: 12.8 – 26.7 MYA). The Caribbean clade is estimated to have split from the mainland *Cyrtognatha* (represented here by a species from Panama) 15.0 MYA (95% HDP: 10.5 – 20.7 MYA). The clade with lineages represented on Lesser Antilles diverged from those on Greater Antilles at 11.5 MYA (95% HDP: 8.3 – 15.6 MYA).

The comparison of all six models of ancestral area estimation with BioGeoBEARS recovered DIVALIKE+J as most suitable for our data due to highest LnL scores in both AIC and AICc tests (Supplementary Table S1). The estimation of ancestral states suggests that the most recent common ancestor of all Caribbean *Cyrtognatha* in our dataset most likely (62%) resided on Hispaniola (Fig. 4). Moreover, all the Greater Antillean island clades as well as the Lesser Antillean clade most likely originated from Hispaniola with the following probability: Jamaican clade (47%), Lesser Antillean clade (40%), Cuban clade (63%) and Puerto Rican clade (89%) (Fig. 4, Supplementary Table S1).

## Discussion

We reconstruct the first *Cyrtognatha* phylogeny using molecular data from over 100 individuals of this rarely collected group. Our results support *Cyrtognatha* as a relatively young clade, having diverged from a common ancestor with its sister genus *Tetragnatha*, in early- to mid-Miocene, and colonized the Caribbean in mid-Miocene. As we discuss below, these estimated ages, combined with the phylogenetic patterns, refute vicariant explanations of their Caribbean origin, including the GAARlandia hypothesis. Instead, the patterns suggest colonization of Hispaniola, and subsequent dispersal to other islands.

The all-terminal phylogeny (Fig. 1) reveals clear patterns of exclusively single island endemic (SIE) species. This holds true even for the three MOTUs on the Lesser Antilles island group, as they appear on Guadelupe, St. Lucia and Grenada (Table 1). Even in the absence of the oceanic barriers, i.e. within the larger islands, we find evidence of short range endemism<sup>119</sup>. While we do not claim to have thorough regional sampling, we find patterns of local endemism in regions where our sampling is particularly dense, providing the strongest test with available data. Many Caribbean spiders such as *Spintharus*<sup>44</sup>, *Micrathena*<sup>120</sup> *Selenops*<sup>121</sup> and *Nops*<sup>122</sup>, as well as other arachnid lineages such as *Amblypygi*<sup>64</sup> and *Pseudoscorpions*<sup>63</sup>, demonstrate a similar pattern. The distribution and quantity of SIEs depends on island properties such as maximum elevation, size, isolation and geological age<sup>123–127</sup>. While our focus was not on the effect of physical properties of islands on SIEs, the patterns seem to point towards a higher number of SIEs on the islands with a higher maximum elevation: Hispaniola (3098 m) is occupied by 4 or 6 MOTUs (depending on the delimitation method), Jamaica (2256 m) by three MOTUs and all other islands (< 2000 m) by a single MOTU. The Caribbean islands, with the exception of Hispaniola, also harbor exclusively monophyletic *Cyrtognatha* lineages. We might explain this observed pattern with a combination of the niche preemption concept and organisms' dispersal ability<sup>128–130</sup>. A combination of the first colonizer's advantageous position to occupy empty niches and rare overwater dispersal events of their closely related species leads to competitive exclusion and lower probability for newcomers to establish viable populations on already occupied islands<sup>131–133</sup>. While niche preemption is better studied in plants, it is also applicable to animals, including spiders<sup>1,134</sup>.

*Cyrtognatha* most likely colonized the Caribbean through long distance overwater dispersal. An ancient vicariant hypothesis would predict that the early proto-Antilles were connected to the continental America and were colonized in the distant past, possibly over 70 MYA<sup>135</sup> and the GAARlandia landbridge putatively existed around 35–33 MYA. These hypothetical scenarios are clearly not reflected in our BEAST chronogram (Fig. 3) in which we estimate that the Caribbean *Cyrtognatha* split from its continental population as late as 13.2 MYA. This suggests that the genus *Cyrtognatha* is much younger than the most reasonable possible vicariant timeframe. Likewise, the reconstructed biogeographic patterns fail to support vicariant scenarios. First, the Jamaican lineage split from Hispaniola soon after colonization (12.2 MYA) even though Jamaica was never a part of the

proto-Antilles. Secondly, Puerto Rico was a part of the proto-Antilles but was colonized only recently (4.8 MYA). The results of Jamaican and Puerto Rican colonization from Hispaniola thus are most consistent with a scenario of colonization by overwater dispersal.

The mid-Miocene (ca. 15 MYA) is considered as the start of the modern Earth<sup>136</sup> in that the climate began to stabilize and the ocean currents started to take their current form. This combination of events enabled the colonization of the Caribbean islands from eastern-northern parts of South America for example via vegetation rafts passively drifting with water currents<sup>137</sup>. That also meant that the wind directions and the hurricane paths most likely resembled those of today<sup>138</sup>, from East to West direction<sup>139</sup>. In fact, hurricanes may create numerous dispersal/colonization opportunities, especially for the organisms with poor active dispersal abilities<sup>135,140</sup>. Wind directions and tropical storms are relevant for tetragnathid spiders like *Cyrtognatha* that disperse by ballooning and could facilitate their colonization of the Caribbean islands in a stepping stone<sup>141</sup> or leap-frog<sup>142</sup> manner.

With the examination of the relationships in the time calibrated phylogeny (Fig. 3), we predict that a single colonization of the Caribbean from the continental America occurred sometime between 10.5 and 20.7 MYA. The most likely scenario indicates the original colonization of the Greater Antilles (Hispaniola; Fig. 4). Such patterns of colonization of Greater Antilles in Miocene are also evident in many other lineages including vertebrates, invertebrates and plants<sup>29,41,143–150</sup>. A more rigorous test of number and directionality of colonization pathways would require more thorough sampling across potential source populations on the mainland.

Our inference of ancestral ranges proposes an early within island diversification of *Cyrtognatha* ancestors occupying Hispaniola and predict that Hispaniola is the ancestral area for all Caribbean clades (Fig. 4, Supplementary Fig. S5). The path of colonization does not resemble a straightforward pattern such as the stepping-stone pattern. The colonization sequence seems more random or resembles a “leap-frog” pattern. In our case the clear example of island being “leap frogged” is Puerto Rico. A leap frog pattern could indicate a role of hurricanes in movement among Caribbean islands<sup>135,151</sup>.

## Conclusions

Our phylogenetic analysis of the tetragnathid spider genus *Cyrtognatha* facilitates reconstruction of its biogeographic history in the Caribbean. The ancestor of this relatively young lineage appears to have colonized the Caribbean overwater in the Miocene and further diversified into an exclusively single island endemic biogeographic pattern seen today. Further sampling of these rarely collected spiders in continental America is needed to confirm the timing, number and source of colonization of the Caribbean and to contrast those from other Caribbean spider clades. For example, *Spintharus*<sup>44,48</sup> and *Deinopis* (Chamberland et al. ‘in review’) patterns clearly support ancient vicariance, but *Argiope*<sup>27</sup> readily disperses among the islands. *Tetragnatha*, the sister lineage of *Cyrtognatha*, may prove to be of particular interest in comparison, because its biogeographic history on the islands may mirror their global tendency towards repeated colonization of even most remote islands.

## References

1. Losos, J. B., Ricklefs, R. E. & MacArthur, R. H. *The Theory of Island Biogeography Revisited* (eds. Losos, J. B. & Ricklefs, R. E.) 476p (Princeton University Press, 2009).
2. Henderson, S. J. & Whittaker, R. J. Islands in *Encyclopedia of Life Sciences* (John Wiley & Sons,



- 2003).
3. Weigelt, P., Jetz, W. & Kreft, H. Bioclimatic and physical characterization of the world's islands. *Proc. Natl. Acad. Sci.* **110**, 15307–15312 (2013).
4. Darwin, C. *On the Origin of Species by Means of Natural Selection* (Murray, London, 1859).
5. Warren, B. H. *et al.* Islands as model systems in ecology and evolution: prospects fifty years after MacArthur-Wilson. *Ecol. Lett.* **18**, 200–217 (2015).
6. O'Grady, P. & DeSalle, R. Out of Hawaii: the origin and biogeography of the genus *Scaptomyza* (Diptera: Drosophilidae). *Biol. Lett.* **4**, 195–199 (2008).
7. Ricklefs, R. E. Historical Biogeography and Extinction in the Hawaiian Honeycreepers. *Am. Nat.* **190**, E106–E111 (2017).
8. Kennedy, S. R., Dawson, T. E. & Gillespie, R. G. Stable isotopes of Hawaiian spiders reflect substrate properties along a chronosequence. *PeerJ* **6**, e4527 (2018).
9. Edgar, G. J., Banks, S., Fariña, J. M., Calvopiña, M. & Martínez, C. Regional biogeography of shallow reef fish and macro-invertebrate communities in the Galapagos archipelago. *J. Biogeogr.* **31**, 1107–1124 (2004).
10. Fournié, G. *et al.* Biogeography of parasitic nematode communities in the Galápagos giant tortoise: Implications for conservation management. *PLoS One* **10**, e0135684 (2015).
11. Carvajal-Endara, S., Hendry, A. P., Emery, N. C. & Davies, T. J. Habitat filtering not dispersal limitation shapes oceanic island floras: species assembly of the Galápagos archipelago. *Ecol. Lett.* **20**, 495–504 (2017).
12. Fattorini, S., Rigal, F., Cardoso, P. & Borges, P. A. V. Using species abundance distribution models and diversity indices for biogeographical analyses. *Acta Oecologica* **70**, 21–28 (2016).
13. Ávila, S. P. *et al.* How did they get here? The biogeography of the marine molluscs of the Azores. *Bull. la Soc. Geol. Fr.* **180**, 295–307 (2009).
14. Schaefer, H. *et al.* The Linnean shortfall in oceanic island biogeography: A case study in the Azores. *J. Biogeogr.* **38**, 1345–1355 (2011).
15. Planas, E. & Ribera, C. Description of six new species of *Loxosceles* (Araneae: Sicariidae) endemic to the Canary Islands and the utility of DNA barcoding for their fast and accurate identification. *Zool. J. Linn. Soc.* **174**, 47–73 (2015).
16. Steinbauer, M. J. *et al.* Biogeographic ranges do not support niche theory in radiating Canary Island plant clades. *Glob. Ecol. Biogeogr.* **25**, 792–804 (2016).
17. Tomé, B. *et al.* Along for the ride or missing it altogether: Exploring the host specificity and diversity of haemogregarines in the Canary Islands. *Parasites and Vectors* **11**, 190 (2018).
18. Oliver, P. M., Travers, S. L., Richmond, J. Q., Pikacha, P. & Fisher, R. N. At the end of the line: Independent overwater colonizations of the Solomon Islands by a hyperdiverse trans-Wallacean lizard lineage (Cyrtodactylus: Gekkota: Squamata). *Zool. J. Linn. Soc.* **182**, 681–694 (2018).
19. Pikacha, P., Morrison, C., Filardi, C. E. & Leung, L. Factors affecting frog species richness in the Solomon Islands. *Pacific Conserv. Biol.* **23**, 387–398 (2017).
20. Weeks, B. C. *et al.* New Behavioral, Ecological, and Biogeographic Data On the Montane Avifauna of Kolombangara, Solomon Islands. *Wilson J. Ornithol.* **129**, 676–700 (2017).

- 391 21. Agnarsson, I. *et al.* Systematics of the Madagascar Anelosimus spiders: Remarkable local  
392 richness and endemism, and dual colonization from the Americas. *Zookeys* **2015**, 13–52  
393 (2015).
- 394 22. Bacon, C. D., Simmons, M. P., Archer, R. H., Zhao, L. C. & Andriantiana, J. Biogeography of the  
395 Malagasy Celastraceae: Multiple independent origins followed by widespread dispersal of  
396 genera from Madagascar. *Mol. Phylogenet. Evol.* **94**, 365–382 (2016).
- 397 23. Lei, R. *et al.* Phylogenomic reconstruction of sportive lemurs (genus *Lepilemur*) recovered  
398 from mitogenomes with inferences for Madagascar biogeography. *J. Hered.* **108**, 107–119  
399 (2017).
- 400 24. Wallis, G. P. *et al.* Rapid biological speciation driven by tectonic evolution in New Zealand.  
401 *Nat. Geosci.* **9**, 140 (2016).
- 402 25. Opell, B. D., Helweg, S. G. & Kiser, K. M. Phylogeography of Australian and New Zealand spray  
403 zone spiders (Anyphaenidae: Amaurobioides): Moa’s Ark loses a few more passengers. *Biol. J.*  
404 *Linn. Soc.* **118**, 959–969 (2016).
- 405 26. McCulloch, G. A., Wallis, G. P. & Waters, J. M. Does wing size shape insect biogeography?  
406 Evidence from a diverse regional stonefly assemblage. *Glob. Ecol. Biogeogr.* **26**, 93–101  
407 (2017).
- 408 27. Agnarsson, I. *et al.* Phylogeography of a good Caribbean disperser: *Argiope argentata*  
409 (Araneae, Araneidae) and a new ‘cryptic’ species from Cuba. *Zookeys* **2016**, 25–44 (2016).
- 410 28. Reynolds, R. G. *et al.* Archipelagic genetics in a widespread Caribbean anole. *J. Biogeogr.* **44**,  
411 2631–2647 (2017).
- 412 29. Tucker, D. B., Hedges, S. B., Colli, G. R., Pyron, R. A. & Sites, J. W. Genomic timetree and  
413 historical biogeography of Caribbean island ameiva lizards (*Pholidoscelis*: Teiidae). *Ecol. Evol.*  
414 **7**, 7080–7090 (2017).
- 415 30. Ricklefs, R. E. & Bermingham, E. The West Indies as a laboratory of biogeography and  
416 evolution. *Philos. Trans. R. Soc. B Biol. Sci.* **363**, 2393–2413 (2008).
- 417 31. Myers, N., Mittermeier, R. A., Mittermeier, C. G., da Fonseca, G. A. B. & Kent, J. Biodiversity  
418 hotspots for conservation priorities. *Nature* **403**, 853 (2000).
- 419 32. Mittermeier, R. A., Turner, W. R., Larsen, F. W., Brooks, T. M. & Gascon, C. Global Biodiversity  
420 Conservation: The Critical Role of Hotspots in *Biodiversity Hotspots* (eds. Zachos, F. E. & Habel,  
421 J. C.) 3–22 (Springer, 2011).
- 422 33. Bowen, B. W., Rocha, L. A., Toonen, R. J. & Karl, S. A. The origins of tropical marine  
423 biodiversity. *Trends Ecol. Evol.* **28**, 359–366 (2013).
- 424 34. Pindell, J. L., Maresch, W. V., Martens, U. & Stanek, K. The Greater Antillean Arc: Early  
425 Cretaceous origin and proposed relationship to Central American subduction mélanges:  
426 Implications for models of Caribbean evolution. *Int. Geol. Rev.* **54**, 131–143 (2012).
- 427 35. Lomolino, M. V., Riddle, B. R. & Whittaker, R. J. *Biogeography: Biological Diversity across*  
428 *Space and Time* (Sinauer Associates Inc., 2017).
- 429 36. Hedges, S. B., Hass, C. A. & Maxson, L. R. Caribbean biogeography: molecular evidence for  
430 dispersal in West Indian terrestrial vertebrates. *Proc. Natl. Acad. Sci.* **89**, 1909–1913 (1992).
- 431 37. Penney, D. & Selden, P. A. Spinning with the dinosaurs: the fossil record of spiders. *Geol.*  
432 *Today* **23**, 231–237 (2007).

- 433 38. Iturralde-Vinent, M. A. & MacPhee, R. D. E. Paleogeography of the Caribbean Region:  
434 Implications for Cenozoic Biogeography. *Bull. Am. Museum Nat. Hist.* **238**, 1–95 (1999).
- 435 39. MacPhee, R. D. E. & Grimaldi, D. A. Mammal bones in Dominican amber. *Nature* **380**, 489–490  
436 (1996).
- 437 40. MacPhee, R. D. E. & Iturralde-Vinent, M. A. First Tertiary Land Mammal from Greater Antille:  
438 An Early Miocene Sloth (Xenarthra, Megalonychidae) From Cuba. *Am. Museum Novit.* 1–13  
439 (1994).
- 440 41. Iturralde-Vinent, M. A. Meso-Cenozoic Caribbean Paleogeography: Implications for the  
441 Historical Biogeography of the Region. *Int. Geol. Rev.* **48**, 791–827 (2006).
- 442 42. Graham, A. Geohistory models and Cenozoic paleoenvironments of the Caribbean region.  
443 *Syst. Bot.* **28**, 378–386 (2003).
- 444 43. Ali, J. R. Colonizing the Caribbean: Is the GAARlandia land-bridge hypothesis gaining a  
445 foothold? *J. Biogeogr.* **39**, 431–433 (2012).
- 446 44. Dziki, A., Binford, G. J., Coddington, J. A. & Agnarsson, I. *Spintharus flavidus* in the Caribbean -  
447 a 30 million year biogeographical history and radiation of a ‘widespread species’. *PeerJ* **3**,  
448 e1422 (2015).
- 449 45. Říčan, O., Piálek, L., Zardoya, R., Doadrio, I. & Zrzavý, J. Biogeography of the Mesoamerican  
450 Cichlidae (Teleostei: Heroini): colonization through the GAARlandia land bridge and early  
451 diversification. *J. Biogeogr.* **40**, 579–593 (2013).
- 452 46. Alonso, R., Crawford, A. J. & Bermingham, E. Molecular phylogeny of an endemic radiation of  
453 Cuban toads (Bufonidae: Peltophryne) based on mitochondrial and nuclear genes. *J. Biogeogr.*  
454 **39**, 434–451 (2012).
- 455 47. Weaver, P. F., Cruz, A., Johnson, S., Dupin, J. & Weaver, K. F. Colonizing the Caribbean:  
456 biogeography and evolution of livebearing fishes of the genus *Limia* (Poeciliidae). *J. Biogeogr.*  
457 **43**, 1808–1819 (2016).
- 458 48. Agnarsson, I. *et al.* A radiation of the ornate Caribbean ‘smiley-faced spiders’, with  
459 descriptions of 15 new species (Araneae: Theridiidae, *Spintharus*). *Zool. J. Linn. Soc.* **182**, 758–  
460 790 (2018).
- 461 49. Uit de Weerd, D. R., Robinson, D. G. & Rosenberg, G. Evolutionary and biogeographical history  
462 of the land snail family Urocoptidae (Gastropoda: Pulmonata) across the Caribbean region. *J.*  
463 *Biogeogr.* **43**, 763–777 (2016).
- 464 50. Nieto-Blázquez, M. E., Antonelli, A. & Roncal, J. Historical Biogeography of endemic seed plant  
465 genera in the Caribbean: Did GAARlandia play a role? *Ecol. Evol.* **7**, 10158–10174 (2017).
- 466 51. Pindell, J. L., Kennan, Stanek, K. P., Maresch, W. V. & Draper, G. Foundations of Gulf of Mexico  
467 and Caribbean evolution : *Geol. Acta* **4**, 303–341 (2009).
- 468 52. Boschman, L. M., van Hinsbergen, D. J. J., Torsvik, T. H., Spakman, W. & Pindell, J. L. Kinematic  
469 reconstruction of the Caribbean region since the Early Jurassic. *Earth-Science Rev.* **138**, 102–  
470 136 (2014).
- 471 53. Morgan, G. S. Quaternary land vertebrates of Jamaica in *Biostratigraphy of Jamaica* (eds.  
472 Wright, R. E. & Robinson, E.) 417–442 (*Geological Society of America Memoir*, 1993).
- 473 54. Buskirk, R. E. Zoogeographic patterns and tectonic history of Jamaica and the northern  
474 Caribbean. *J. Biogeogr.* **12**, 445 (1985).

- 475 55. Nagle, F., Stipp, J. J. & Fisher, D. E. K-Ar geochronology of the Limestone Caribbees and  
476 Martinique, Lesser Antilles, West Indies. *Earth Planet. Sci. Lett.* **29**, 401–412 (1976).
- 477 56. Peck, S. B. Diversity and distribution of beetles (Insecta: Coleoptera) of the northern Leeward  
478 Islands. *Maarten Insecta Mundi* **678** (2011).
- 479 57. Ricklefs, R. E. & Lovette, I. J. The roles of island area per se and habitat diversity in the species-  
480 area relationships of four Lesser Antillean faunal groups. *J. Anim. Ecol.* **68**, 1142–1160 (1999).
- 481 58. Garmon, W. T., Allen, C. D. & Groom, K. M. *Landscapes and Landforms of the Lesser Antilles*.  
482 (Springer, 2017).
- 483 59. Munch, P. *et al.* Pliocene to Pleistocene carbonate systems of the Guadeloupe archipelago,  
484 french lesser antilles: A land and sea study (the KaShallow project). *Bull. la Soc. Geol. Fr.* **184**,  
485 99–110 (2013).
- 486 60. Hedges, S. B. Historical Biogeography of West Indian Vertebrates. *Annu. Rev. Ecol. Syst.* **27**,  
487 163–196 (1996).
- 488 61. Surget-Groba, Y. & Thorpe, R. S. A likelihood framework analysis of an island radiation:  
489 phylogeography of the Lesser Antillean gecko *Sphaerodactylus vincenti* in comparison with  
490 the anole *Anolis roquet*. *J. Biogeogr.* **40**, 105–116 (2013).
- 491 62. Crews, S. C., Puente-Rolón, A. R., Rutstein, E. & Gillespie, R. G. A comparison of populations of  
492 island and adjacent mainland species of Caribbean *Selenops* (Araneae: Selenopidae) spiders.  
493 *Mol. Phylogenet. Evol.* **54**, 970–83 (2010).
- 494 63. Cosgrove, J. G., Agnarsson, I., Harvey, M. S. & Binford, G. J. Pseudoscorpion diversity and  
495 distribution in the West Indies: sequence data confirm single island endemism for some  
496 clades, but not others. *J. Arachnol.* **44**, 257–271 (2016).
- 497 64. Esposito, L. A. *et al.* Islands within islands: Diversification of tailless whip spiders (Amblypygi,  
498 *Phrynos*) in Caribbean caves. *Mol. Phylogenet. Evol.* **93**, 107–117 (2015).
- 499 65. World Spider Catalog. World Spider Catalog Version 19.0 <http://wsc.nmbe.ch>, (2018).
- 500 66. Agnarsson, I., Coddington, J. A. & Kuntner, M. Systematics: Progress in the study of spider  
501 diversity and evolution in *Spider Research in the 21st Century: Trends and Perspectives* (ed.  
502 Penney, D.) (Siri scientific press, 2013).
- 503 67. Bell, J. R., Bohan, D. A., Shaw, E. M. & Weyman, G. S. Ballooning dispersal using silk: world  
504 fauna, phylogenies, genetics and models. *Bull. Entomol. Res.* **95**, 69–114 (2005).
- 505 68. Wu, L., Si, X., Didham, R. K., Ge, D. & Ding, P. Dispersal modality determines the relative  
506 partitioning of beta diversity in spider assemblages on subtropical land-bridge islands. *J.*  
507 *Biogeogr.* **44**, 2121–2131 (2017).
- 508 69. Lee, V. M. J., Kuntner, M. & Li, D. Ballooning behavior in the golden orbweb spider *Nephila*  
509 *pilipes* (Araneae: Nephilidae). *Front. Ecol. Evol.* **3**, 2 (2015).
- 510 70. Lafage, D., Sibelle, C., Secondi, J., Canard, A. & Pétillon, J. Short-term resilience of arthropod  
511 assemblages after spring flood, with focus on spiders (Arachnida: Araneae) and carabids  
512 (Coleoptera: Carabidae). *Ecohydrology* **8**, 1584–1599 (2015).
- 513 71. Reynolds, A. M., Bohan, D. A. & Bell, J. R. Ballooning dispersal in arthropod taxa: conditions at  
514 take-off. *Biol. Lett.* **3**, 237–40 (2007).
- 515 72. Kuntner, M. & Agnarsson, I. Phylogeography of a successful aerial disperser: The golden orb  
516 spider *Nephila* on Indian Ocean islands. *BMC Evol. Biol.* **11**, (2011).

- 517 73. Szymkowiak, P., Górski, G. & Bajerlein, D. Passive dispersal in arachnids. *Biol. Lett* **44**, 75–101  
518 (2007).
- 519 74. Edwards, J. S. & Thornton, I. W. B. Colonization of an Island Volcano, Long Island, Papua New  
520 Guinea, and an Emergent Island, Motmot, in Its Caldera Lake. VI. The Pioneer Arthropod  
521 Community of Motmot. *Source J. Biogeogr.* **28**, 1379–1388 (2016).
- 522 75. Xu, X. *et al.* A genus-level taxonomic review of primitively segmented spiders (Mesothelae,  
523 Liphistiidae). *Zookeys* **488**, 121–151 (2015).
- 524 76. Xu, X. *et al.* Pre-Pleistocene geological events shaping diversification and distribution of  
525 primitively segmented spiders on East Asian margins. *J. Biogeogr.* **43**, 1004–1019 (2016).
- 526 77. Xu, X. *et al.* Extant primitively segmented spiders have recently diversified from an ancient  
527 lineage. *Proc. R. Soc. B Biol. Sci.* **282**, 20142486–20142486 (2015).
- 528 78. Bond, J. E., Hedin, M. C., Ramirez, M. G. & Opell, B. D. Deep molecular divergence in the  
529 absence of morphological and ecological change in the californian coastal dune endemic  
530 trapdoor spider *Aptostichus simus*. *Mol. Ecol.* **10**, 899–910 (2001).
- 531 79. Bond, J. E., Beamer, D. A., Lamb, T. & Hedin, M. C. Combining genetic and geospatial analyses  
532 to infer population extinction in mygalomorph spiders endemic to the Los Angeles region.  
533 *Anim. Conserv.* **9**, 145–157 (2006).
- 534 80. Hedin, M. C., Starrett, J. & Hayashi, C. Crossing the uncrossable: Novel trans-valley  
535 biogeographic patterns revealed in the genetic history of low-dispersal mygalomorph spiders  
536 (Antrodiaetidae, *Antrodiaetus*) from California. *Mol. Ecol.* **22**, 508–526 (2013).
- 537 81. GBIF. Global Biodiversity Information Facility (GBIF). *Nat. Hist.* (2012).
- 538 82. Dimitrov, D. & Hormiga, G. Revision and Cladistic Analysis of the Orbweaving Spider Genus  
539 *Cyrtognatha*. *Bull. Am. Museum Nat. Hist.* **1881**, 140 (2009).
- 540 83. Dimitrov, D. *et al.* Tangled in a sparse spider web: single origin of orb weavers and their  
541 spinning work unravelled by denser taxonomic sampling. *Proc. R. Soc. B Biol. Sci.* **279**, 1341–  
542 1350 (2012).
- 543 84. Wheeler, W. C. *et al.* The spider tree of life: phylogeny of Araneae based on target-gene  
544 analyses from an extensive taxon sampling. *Cladistics* **33**, 574–616 (2017).
- 545 85. Alvarez-Padilla, F., Dimitrov, D., Giribet, G. & Hormiga, G. Phylogenetic relationships of the  
546 spider family Tetragnathidae (Araneae, Araneoidea) based on morphological and DNA  
547 sequence data. *Cladistics* **25**, 109–146 (2009).
- 548 86. Coddington, J. A., Griswold, C. E., Silva, D., Penaranda, E. & Larcher, S. F. Designing and testing  
549 sampling protocols to estimate biodiversity in tropical ecosystems. (Int. Congr. Syst. Evol. Biol.  
550 1991).
- 551 87. Hebert, P. D. N., Cywinska, A., Ball, S. L. & deWaard, J. R. Biological identifications through  
552 DNA barcodes. *Proc. Biol. Sci.* **270**, 313–321 (2003).
- 553 88. Čandek, K. & Kuntner, M. DNA barcoding gap: Reliable species identification over  
554 morphological and geographical scales. *Mol. Ecol. Resour.* **15**, 268–277 (2015).
- 555 89. Folmer, O., Black, M., Hoeh, W., Lutz, R. & Vrijenhoek, R. DNA primers for amplification of  
556 mitochondrial cytochrome c oxidase subunit I from diverse metazoan invertebrates. *Mol.*  
557 *Mar. Biol. Biotechnol.* **3**, 294–299 (1994).
- 558 90. Hedin, M. C. & Maddison, W. P. A Combined Molecular Approach to Phylogeny of the Jumping



- 559 Spider Subfamily Dendryphantinae (Araneae: Salticidae). *Mol. Phylogenet. Evol.* **18**, 386–403  
560 (2001).
- 561 91. Nunn, G. B., Theisen, B. F., Christensen, B. & Arctander, P. Simplicity-correlated size growth of  
562 the nuclear 28S ribosomal RNA D3 expansion segment in the crustacean order isopoda. *J. Mol.*  
563 *Evol.* **42**, 211–223 (1996).
- 564 92. Whiting, M. F. Mecoptera is paraphyletic: multiple genes and phylogeny of Mecoptera and  
565 Siphonaptera. *Zool. Scr.* **31**, 93–104 (2002).
- 566 93. Kearse, M. *et al.* Geneious Basic: An integrated and extendable desktop software platform for  
567 the organization and analysis of sequence data. *Bioinformatics* **28**, 1647–1649 (2012).
- 568 94. Katoh, K. & Standley, D. M. MAFFT Multiple Sequence Alignment Software Version 7:  
569 Improvements in Performance and Usability. *Mol. Biol. Evol.* **30**, 772–780 (2013).
- 570 95. Maddison, W. & Maddison, D. Mesquite: a modular system for evolutionary analysis version  
571 3.51 <http://www.mesquiteproject.org> (2018).
- 572 96. Zhang, J., Kapli, P., Pavlidis, P. & Stamatakis, A. A general species delimitation method with  
573 applications to phylogenetic placements. *Bioinformatics* **29**, 2869–76 (2013).
- 574 97. Kapli, P. *et al.* Multi-rate Poisson tree processes for single-locus species delimitation under  
575 maximum likelihood and Markov chain Monte Carlo. *Bioinformatics* **33**, 1630–1638 (2017).
- 576 98. Fujisawa, T. & Barraclough, T. G. Delimiting species using single-locus data and the generalized  
577 mixed yule coalescent approach: A revised method and evaluation on simulated data sets.  
578 *Syst. Biol.* **62**, 707–724 (2013).
- 579 99. Puillandre, N., Lambert, A., Brouillet, S. & Achaz, G. ABGD, automatic barcode gap discovery  
580 for primary species delimitation. *Mol. Ecol.* **21**, 1864–1877 (2012).
- 581 100. Bouckaert, R. *et al.* Beast2: A software platform for Bayesian evolutionary analysis. *PLoS*  
582 *Comput. Biol.* **10**, 1003537 (2013).
- 583 101. Tamura, K., Stecher, G., Peterson, D., Filipowski, A. & Kumar, S. MEGA6: Molecular Evolutionary  
584 Genetics Analysis Version 6.0. *Mol. Biol. Evol.* **30**, 2725–2729 (2013).
- 585 102. Huelsenbeck, J. P. & Ronquist, F. MR BAYES: Bayesian inference of phylogenetic trees.  
586 *Bioinformatics* **17**, 754–755 (2001).
- 587 103. Darriba, D., Taboada, G. L., Doallo, R. & Posada, D. jModelTest 2: more models, new heuristics  
588 and parallel computing. *Nat. Methods* **9**, 772–772 (2012).
- 589 104. Golenberg, E. M., Clegg, M. T., Durbin, M. L., Doebley, J. & Ma, D. P. Evolution of a noncoding  
590 region of the chloroplast genome. *Mol. Phylogenet. Evol.* **2**, 52–64 (1993).
- 591 105. Kelchner, S. A. The Evolution of Non-Coding Chloroplast DNA and Its Application in Plant  
592 Systematics. *Ann. Missouri Bot. Gard.* **87**, 482 (2000).
- 593 106. Borchsenius, F. FastGap 1.2. [http://www.aubot.dk/FastGap\\_home.htm](http://www.aubot.dk/FastGap_home.htm) (2009).
- 594 107. Bouckaert, R. & Drummond, A. J. bModelTest: Bayesian phylogenetic site model averaging  
595 and model comparison. *BMC Evol. Biol.* **17**, 42 (2017).
- 596 108. Bouckaert, R., Alvarado-Mora, M. V & Rebello Pinho, J. R. Evolutionary rates and HBV: issues  
597 of rate estimation with Bayesian molecular methods. *Antivir. Ther.* **18**, 497–503 (2013).
- 598 109. Bidegaray-Batista, L. & Arnedo, M. A. Gone with the plate: the opening of the Western

- 599 Mediterranean basin drove the diversification of ground-dweller spiders. *BMC. Evol. Biol.* **11**,  
600 317 (2011).
- 601 110. Rambaut, A., Drummond, A. J., Xie, D., Baele, G. & Suchard, M. A. Posterior summarisation in  
602 Bayesian phylogenetics using Tracer 1.7. *Syst. Biol.* 1–3 (2018).
- 603 111. Rambaut, A. FigTree v 1.4.3. <http://tree.bio.ed.ac.uk/software/figtree/> (2018).
- 604 112. Miller, M. A., Pfeiffer, W. & Schwartz, T. Creating the CIPRES Science Gateway for inference of  
605 large phylogenetic trees in *Gateway Computing Environments Workshop* (2010).
- 606 113. Matzke, N. J. Probabilistic historical biogeography: New models for founder-event speciation,  
607 imperfect detection, and fossils allow improved accuracy and model-testing. *Front. Biogeogr.*  
608 **5**, 242–248 (2013).
- 609 114. R Core Team. R: A language and environment for statistical computing. R Foundation for  
610 Statistical Computing <https://cran.r-project.org/> (2018).
- 611 115. Lam, A. R., Stigall, A. L. & Matzke, N. J. Dispersal in the Ordovician: Speciation patterns and  
612 paleobiogeographic analyses of brachiopods and trilobites. *Palaeogeogr. Palaeoclimatol.*  
613 *Palaeoecol.* **489**, 147–165 (2018).
- 614 116. Pereira, A. G. & Schrago, C. G. Arrival and diversification of mabuyine skinks (Squamata:  
615 Scincidae) in the Neotropics based on a fossil-calibrated timetree. *PeerJ* **5**, e3194 (2017).
- 616 117. Heads, M. Old taxa on young Islands: A critique of the use of Island age to date Island-  
617 endemic clades and calibrate phylogenies. *Syst. Biol.* **60**, 204–218 (2011).
- 618 118. Hipsley, C. A. & Müller, J. Beyond fossil calibrations: Realities of molecular clock practices in  
619 evolutionary biology. *Front. Genet.* **5**, 138 (2014).
- 620 119. Harvey, M. S. Short-range endemism among the Australian fauna: Some examples from non-  
621 marine environments. *Invertebr. Syst.* **16**, 555–570 (2002).
- 622 120. McHugh, A., Yablonsky, C., Binford, G. J. & Agnarsson, I. Molecular phylogenetics of Caribbean  
623 *Micrathena* (Araneae: Araneidae) suggests multiple colonisation events and single island  
624 endemism. *Invertebr. Syst.* **28**, 337–349 (2014).
- 625 121. Crews, S. C. & Gillespie, R. G. Molecular systematics of *Selenops* spiders (Araneae:  
626 Selenopidae) from North and Central America: Implications for Caribbean biogeography. *Biol.*  
627 *J. Linn. Soc.* **101**, 288–322 (2010).
- 628 122. Sánchez-Ruiz, A., Brescovit, A. D. & Alayón, G. Four new caponiids species (Araneae,  
629 Caponiidae) from the West Indies and redescription of *Nops blandus* (Bryant). *Zootaxa* **3972**,  
630 43–64 (2015).
- 631 123. Kallimanis, A. S. *et al.* Biogeographical determinants for total and endemic species richness in  
632 a continental archipelago. *Biodivers. Conserv.* **19**, 1225–1235 (2010).
- 633 124. Gray, A. & Cavers, S. Island biogeography, the effects of taxonomic effort and the importance  
634 of island niche diversity to single-island endemic species. *Syst. Biol.* **63**, 55–65 (2014).
- 635 125. Whittaker, R. J., Triantis, K. A. & Ladle, R. J. A general dynamic theory of oceanic island  
636 biogeography. *J. Biogeogr.* **35**, 977–994 (2008).
- 637 126. Dalsgaard, B. *et al.* Determinants of bird species richness, endemism, and island network roles  
638 in Wallacea and the West Indies: Is geography sufficient or does current and historical climate  
639 matter? *Ecol. Evol.* **4**, 4019–4031 (2014).

- 640 127. Steinbauer, M. J., Otto, R., Naranjo-Cigala, A., Beierkuhnlein, C. & Fernández-Palacios, J. M.  
641 Increase of island endemism with altitude - speciation processes on oceanic islands.  
642 *Ecography (Cop.)*. **35**, 23–32 (2012).
- 643 128. Bellemain, E. & Ricklefs, R. E. Are islands the end of the colonization road? *Trends Ecol. Evol.*  
644 **23**, 461–468 (2008).
- 645 129. Silvertown, J., Francisco-Ortega, J. & Carine, M. A. The monophyly of island radiations: An  
646 evaluation of niche pre-emption and some alternative explanations. *J. Ecol.* **93**, 653–657  
647 (2005).
- 648 130. Mwangi, P. N. *et al.* Niche pre-emption increases with species richness in experimental plant  
649 communities. *J. Ecol.* **95**, 65–78 (2007).
- 650 131. Wiens, J. A. *The Ecology of Bird Communities: Volume 2: Processes and Variations*, (Cambridge  
651 University Press, 1989).
- 652 132. Fukami, T. Historical contingency in community assembly: Integrating niches, species pools,  
653 and priority effects. *Annu. Rev. Ecol. Evol. Syst.* **46**, 1–23 (2015).
- 654 133. Esselstyn, J. A., Maher, S. P. & Brown, R. M. Species interactions during diversification and  
655 community assembly in an Island radiation of shrews. *PLoS One* **6**, e21885 (2011).
- 656 134. Garb, J. E. & Gillespie, R. G. Island hopping across the central Pacific: Mitochondrial DNA  
657 detects sequential colonization of the Austral Islands by crab spiders (Araneae: Thomisidae). *J.*  
658 *Biogeogr.* **33**, 201–220 (2006).
- 659 135. Hedges, S. B. Biogeography of the West Indies: An overview in *Biogeography of the West*  
660 *Indies: Patterns and perspectives* (eds. Woods, C. A. & Sergile, F. E.) (CRC Press, 2001).
- 661 136. Pound, M. J., Haywood, A. M., Salzmann, U. & Riding, J. B. Global vegetation dynamics and  
662 latitudinal temperature gradients during the mid to late Miocene (15.97–5.33Ma). *Earth Sci.*  
663 *Rev.* **112**, 1–22 (2012).
- 664 137. Ketmaier, V., Giusti, F. & Caccone, A. Molecular phylogeny and historical biogeography of the  
665 land snail genus *Solatopupa* (Pulmonata) in the peri-Tyrrhenian area. *Mol. Phylogenet. Evol.*  
666 **39**, 439–451 (2006).
- 667 138. Quan, C., Liu, Y.-S., Tang, H. & Utescher, T. Miocene shift of European atmospheric circulation  
668 from trade wind to westerlies. *Sci. Rep.* **4**, 5660 (2015).
- 669 139. Andraca-Gómez, G. *et al.* A potential invasion route of *Cactoblastis cactorum* within the  
670 Caribbean region matches historical hurricane trajectories. *Biol. Invasions* **17**, 1397–1406  
671 (2015).
- 672 140. Censky, E. J., Hodge, K. & Dudley, J. Over-water dispersal of lizards due to hurricanes. *Nature*  
673 **395**, 556 (1998).
- 674 141. Gilpin, M. E. The role of stepping-stone islands. *Theor. Popul. Biol.* **17**, 247–253 (1980).
- 675 142. Baskin, J. N. & Williams, E. E. The Lesser Antillean Ameiva (Sauria, Teiidae): Re-evaluation,  
676 zoogeography and the effects of predation. *Stud. Fauna Curaçao other Caribb. Islands* **23**,  
677 144–176 (1966).
- 678 143. Fabre, P.-H. *et al.* Rodents of the Caribbean: origin and diversification of hutias unravelled by  
679 next-generation museomics. *Biol. Lett.* **10**, (2014).
- 680 144. Hedges, S. B. Paleogeography of the Antilles and origin of West Indian terrestrial vertebrates.  
681 *Ann. Missouri Bot. Gard.* **93**, 231–244 (2006).

145. Dávalos, L. M. Phylogeny and biogeography of Caribbean mammals. *Biol. J. Linn. Soc.* **81**, 373–394 (2004).
146. Reynolds, R. G. *et al.* Molecular phylogeny and historical biogeography of West Indian boid snakes (*Chilabothrus*). *Mol. Phylogenet. Evol.* **68**, 461–470 (2013).
147. MacPhee, R. D. E. ‘First’ appearances in the Cenozoic land-mammal record of the Greater Antilles: Significance and comparison with South American and Antarctic records. *J. Biogeogr.* **32**, 551–564 (2005).
148. Cervantes, A., Fuentes, S., Gutiérrez, J., Magallón, S. & Borsch, T. Successive arrivals since the Miocene shaped the diversity of the Caribbean Acalyphoideae (Euphorbiaceae). *J. Biogeogr.* **43**, 1773–1785 (2016).
149. Si, X. *et al.* Functional and phylogenetic structure of island bird communities. *J. Anim. Ecol.* **86**, 532–542 (2017).
150. Pyron, R. A. & Burbrink, F. T. Ecological and evolutionary determinants of species richness and phylogenetic diversity for island snakes. *Glob. Ecol. Biogeogr.* **23**, 848–856 (2014).
151. Glor, R. E., Losos, J. B. & Larson, A. Out of Cuba: Overwater dispersal and speciation among lizards in the *Anolis carolinensis* subgroup. *Mol. Ecol.* **14**, 2419–2432 (2005).

## Competing Interests

The authors declare no competing interests.

## Contributions

Research design: K.Č., I.A., G.B., M.K. Material acquisition and molecular procedures: I.A., G.B., K.Č., M.K. Data analyses: K.Č. K.Č. wrote the first draft of the paper. All authors contributed to writing and revising the paper.

## Data availability

All data generated in this study and protocols needed to replicate it are included in this published article and its Supplementary material files.

## Acknowledgements

We thank the entire CarBio team (<http://www.islandbiogeography.org/participants.html>) for collecting the material across the Caribbean. Moreover, we thank Lisa Chamberland and other members of the Agnarsson lab (<http://www.theridiidae.com/lab-members.html>) for the help with material sorting and molecular procedures. This work was supported by grants from the National Science Foundation (DEB-1314749, DEB-1050253), and the Slovenian Research Agency (J1-6729, P1-0236, BI-US/17-18-011).

## Figure legends

**Figure 1:** A) Map of the Caribbean with indicated sampling localities. B) The all-terminal mitochondrial Bayesian phylogeny of *Cyrtognatha*. Branch colors match those of the islands in A. Notice that all putative species form exclusively single island endemic pattern.

**Figure 2:** Species level Bayesian phylogeny of *Cyrtognatha* based on CO1 and 28S. Relationships agree with *Cyrtognatha* and Caribbean *Cyrtognatha* monophyly.

**Figure 3:** Time-calibrated BEAST phylogeny of *Cyrtognatha*. This chronogram suggests *Cyrtognatha* colonized the Caribbean in mid-Miocene and refutes ancient vicariant scenarios. The lack of any land bridge connection of the Caribbean with mainland at least since early Oligocene (cca. 33 MYA; GAARlandia) suggests that colonization happened by overwater dispersal. Confidence intervals of clade ages agree with geological history of Caribbean islands.

**Figure 4:** Ancestral area estimation of *Cyrtognatha* with BioGeoBEARS. The biogeographical analysis, using the most suitable model for our data (DIVALIKE + J, max\_range\_size = 2), revealed that Hispaniola was most likely colonized first. Following colonization, *Cyrtognatha* diversified within Hispaniola and subsequently dispersed from there to all other islands of the Caribbean.

**Table 1:** Detailed information on *Cyrtognatha* specimens and outgroups.

| Genus       | Species/<br>MOTU | Voucher<br>code | Location    | Lat.     | Lon.      | CO1 accession<br>number | 28S accession<br>number |
|-------------|------------------|-----------------|-------------|----------|-----------|-------------------------|-------------------------|
| Cyrtognatha | elyunquensis     | 00392873        | Puerto Rico | 18.29574 | -65.79065 |                         |                         |
| Cyrtognatha | elyunquensis     | 00392894        | Puerto Rico | 18.29574 | -65.79065 |                         |                         |
| Cyrtognatha | elyunquensis     | 00392865        | Puerto Rico | 18.29574 | -65.79065 |                         |                         |
| Cyrtognatha | elyunquensis     | 00392845        | Puerto Rico | 18.17213 | -65.77074 |                         |                         |
| Cyrtognatha | elyunquensis     | 00392808        | Puerto Rico | 18.28925 | -65.77877 |                         |                         |
| Cyrtognatha | elyunquensis     | 00392813        | Puerto Rico | 18.28925 | -65.77877 |                         |                         |
| Cyrtognatha | elyunquensis     | 00392764        | Puerto Rico | 18.28925 | -65.77877 |                         |                         |
| Cyrtognatha | elyunquensis     | 00392745        | Puerto Rico | 18.28925 | -65.77877 |                         |                         |
| Cyrtognatha | elyunquensis     | 00392732        | Puerto Rico | 18.28925 | -65.77877 |                         |                         |
| Cyrtognatha | elyunquensis     | 00392911        | Puerto Rico | 18.29574 | -65.79065 |                         |                         |
| Cyrtognatha | elyunquensis     | 00392843        | Puerto Rico | 18.29574 | -65.79065 |                         |                         |
| Cyrtognatha | elyunquensis     | 00392763        | Puerto Rico | 18.29574 | -65.79065 |                         |                         |
| Cyrtognatha | elyunquensis     | 00392853        | Puerto Rico | 18.29574 | -65.79065 |                         |                         |
| Cyrtognatha | elyunquensis     | 00782105        | Puerto Rico | 18.17326 | -66.59015 |                         |                         |
| Cyrtognatha | elyunquensis     | 00782116        | Puerto Rico | 18.17326 | -66.59015 |                         |                         |
| Cyrtognatha | elyunquensis     | 00782110        | Puerto Rico | 18.17326 | -66.59015 |                         |                         |
| Cyrtognatha | espanola         | 00782473        | Hispaniola  | 19.35504 | -070.111  |                         |                         |
| Cyrtognatha | espanola         | 00782595        | Hispaniola  | 19.35504 | -070.111  |                         |                         |
| Cyrtognatha | espanola         | 00782517        | Hispaniola  | 19.35504 | -070.111  |                         |                         |
| Cyrtognatha | espanola         | 00782495        | Hispaniola  | 19.35504 | -070.111  |                         |                         |
| Cyrtognatha | espanola         | 00782505        | Hispaniola  | 19.35504 | -070.111  |                         |                         |
| Cyrtognatha | espanola         | 00782511        | Hispaniola  | 19.35504 | -070.111  |                         |                         |
| Cyrtognatha | espanola         | 00785757        | Hispaniola  | 19.35504 | -070.111  |                         |                         |
| Cyrtognatha | espanola         | 00784817        | Hispaniola  | 19.35504 | -070.111  |                         |                         |



|             |          |           |            |          |            |
|-------------|----------|-----------|------------|----------|------------|
| Cyrtognatha | espanola | 00784739  | Hispaniola | 19.35504 | -070.111   |
| Cyrtognatha | espanola | 00785433  | Hispaniola | 19.35504 | -070.111   |
| Cyrtognatha | espanola | 00785697  | Hispaniola | 19.35504 | -070.111   |
| Cyrtognatha | espanola | 00782558  | Hispaniola | 19.35504 | -070.111   |
| Cyrtognatha | espanola | 00785592  | Hispaniola | 19.35504 | -070.111   |
| Cyrtognatha | espanola | 00785705  | Hispaniola | 19.35504 | -070.111   |
| Cyrtognatha | espanola | 00785514  | Hispaniola | 19.35504 | -070.111   |
| Cyrtognatha | espanola | 00782583  | Hispaniola | 19.07796 | -69.46635  |
| Cyrtognatha | espanola | 00782543  | Hispaniola | 19.35504 | -070.111   |
| Cyrtognatha | espanola | 00785737  | Hispaniola | 19.35504 | -070.111   |
| Cyrtognatha | espanola | 00785647  | Hispaniola | 19.35504 | -070.111   |
| Cyrtognatha | espanola | 00787109  | Hispaniola | 19.03627 | -70.54337  |
| Cyrtognatha | espanola | 00787194  | Hispaniola | 19.03627 | -70.54337  |
| Cyrtognatha | espanola | 00787211  | Hispaniola | 19.03627 | -70.54337  |
| Cyrtognatha | espanola | 00787181  | Hispaniola | 19.03627 | -70.54337  |
| Cyrtognatha | espanola | 00784482  | Hispaniola | 19.05116 | -70.88866  |
| Cyrtognatha | SP1      | 00001244A | Guadeloupe | 16.04208 | -061.63816 |
| Cyrtognatha | SP1      | 00001272A | Guadeloupe | 16.04208 | -061.63816 |
| Cyrtognatha | SP1      | 00001314A | Guadeloupe | 16.04208 | -061.63816 |
| Cyrtognatha | SP1      | 00001319A | Guadeloupe | 16.04208 | -061.63816 |
| Cyrtognatha | SP1      | 00001325A | Guadeloupe | 16.04208 | -61.63816  |
| Cyrtognatha | SP2      | 00787050  | Hispaniola | N/A      | N/A        |
| Cyrtognatha | SP2      | 00787032  | Hispaniola | N/A      | N/A        |
| Cyrtognatha | SP2      | 00787053  | Hispaniola | N/A      | N/A        |
| Cyrtognatha | SP2      | 00787040  | Hispaniola | N/A      | N/A        |
| Cyrtognatha | SP2      | 00787095  | Hispaniola | 19.03750 | -70.96918  |
| Cyrtognatha | SP2B     | 00786963  | Hispaniola | 18.82208 | -070.6838  |
| Cyrtognatha | SP2C     | 00784541  | Hispaniola | 18.09786 | -71.18925  |
| Cyrtognatha | SP4      | 00002436A | Jamaica    | 18.04833 | -76.61814  |
| Cyrtognatha | SP4      | 00003042A | Jamaica    | 18.04833 | -76.61814  |
| Cyrtognatha | SP4      | 00003025A | Jamaica    | 18.04833 | -76.61814  |
| Cyrtognatha | SP4      | 00002399A | Jamaica    | 18.04833 | -76.61814  |
| Cyrtognatha | SP4      | 00002589A | Jamaica    | 18.04833 | -76.61814  |
| Cyrtognatha | SP4      | 00002990A | Jamaica    | 18.05350 | -76.59950  |
| Cyrtognatha | SP4      | 00004283A | Jamaica    | 18.05350 | -76.59950  |
| Cyrtognatha | SP4      | 00004492A | Jamaica    | 18.05350 | -76.59950  |
| Cyrtognatha | SP4      | 00004414A | Jamaica    | 18.05350 | -76.59950  |
| Cyrtognatha | SP4      | 00004313A | Jamaica    | 18.05350 | -76.59950  |
| Cyrtognatha | SP4      | 00004384A | Jamaica    | 18.05350 | -76.59950  |
| Cyrtognatha | SP4      | 00003825A | Jamaica    | 18.05350 | -76.59950  |
| Cyrtognatha | SP4      | 00003822A | Jamaica    | 18.05350 | -76.59950  |
| Cyrtognatha | SP4      | 00004474A | Jamaica    | 18.05350 | -76.59950  |
| Cyrtognatha | SP4      | 00004456A | Jamaica    | 18.05350 | -76.59950  |
| Cyrtognatha | SP4      | 00004029A | Jamaica    | 18.05350 | -76.59950  |

|             |              |           |             |          |           |          |          |
|-------------|--------------|-----------|-------------|----------|-----------|----------|----------|
| Cyrtognatha | SP4          | 00004432A | Jamaica     | 18.05350 | -76.59950 |          |          |
| Cyrtognatha | SP4          | 00004294A | Jamaica     | 18.05350 | -76.59950 |          |          |
| Cyrtognatha | SP4          | 00004170A | Jamaica     | 18.05350 | -76.59950 |          |          |
| Cyrtognatha | SP4          | 00004335A | Jamaica     | 18.05350 | -76.59950 |          |          |
| Cyrtognatha | SP4          | 00004444A | Jamaica     | 18.05350 | -76.59950 |          |          |
| Cyrtognatha | SP4          | 00004206A | Jamaica     | 18.05350 | -76.59950 |          |          |
| Cyrtognatha | SP4          | 00004209A | Jamaica     | 18.05350 | -76.59950 |          |          |
| Cyrtognatha | SP4          | 00004202A | Jamaica     | 18.05350 | -76.59950 |          |          |
| Cyrtognatha | SP4          | 00004462A | Jamaica     | 18.05350 | -76.59950 |          |          |
| Cyrtognatha | SP4          | 00004310A | Jamaica     | 18.05350 | -76.59950 |          |          |
| Cyrtognatha | SP4          | 00004010A | Jamaica     | 18.05350 | -76.59950 |          |          |
| Cyrtognatha | SP4          | 00004136A | Jamaica     | 18.05350 | -76.59950 |          |          |
| Cyrtognatha | SP5          | 00003183A | Jamaica     | 18.34769 | -77.64158 |          |          |
| Cyrtognatha | SP5          | 00002964A | Jamaica     | 18.34769 | -77.64158 |          |          |
| Cyrtognatha | SP6          | 00003815A | Jamaica     | 18.05350 | -76.59950 |          |          |
| Cyrtognatha | SP6          | 00003173A | Jamaica     | 18.05350 | -76.59950 |          |          |
| Cyrtognatha | SP7          | 00782814  | Cuba        | 20.01309 | -76.83400 |          |          |
| Cyrtognatha | SP7          | 00782885  | Cuba        | 20.01309 | -76.83400 |          |          |
| Cyrtognatha | SP7          | 00782894  | Cuba        | 20.01309 | -76.83400 |          |          |
| Cyrtognatha | SP7          | 00000564A | Cuba        | 20.31504 | -76.55337 |          |          |
| Cyrtognatha | SP7          | 00000232A | Cuba        | 20.31504 | -76.55337 |          |          |
| Cyrtognatha | SP7          | 00000317A | Cuba        | 20.31504 | -76.55337 |          |          |
| Cyrtognatha | SP7          | 00784348  | Cuba        | 20.00939 | -76.89402 |          |          |
| Cyrtognatha | SP8          | 00784418  | Hispaniola  | 19.05116 | -70.88866 |          |          |
| Cyrtognatha | SP8          | 00784494  | Hispaniola  | 19.05116 | -70.88866 |          |          |
| Cyrtognatha | SP8          | 00787280  | Hispaniola  | 19.05116 | -70.88866 |          |          |
| Cyrtognatha | SP8          | 00784608  | Hispaniola  | 19.05116 | -70.88866 |          |          |
| Cyrtognatha | SP8          | 00787174  | Hispaniola  | 19.05116 | -70.88866 |          |          |
| Cyrtognatha | SP8          | 00787178  | Hispaniola  | 19.05116 | -70.88866 |          |          |
| Cyrtognatha | SP10         | 00001639A | Grenada     | 12.09501 | -61.69500 |          |          |
| Cyrtognatha | SP10         | 00001673A | Grenada     | 12.09501 | -61.69500 |          |          |
| Cyrtognatha | SP10         | 00001688A | Grenada     | 12.09501 | -61.69500 |          |          |
| Cyrtognatha | SP10         | 00001792A | Grenada     | 12.09501 | -61.69500 |          |          |
| Cyrtognatha | SP10B        | 00001680A | Saint Lucia | 13.96448 | -60.94473 |          |          |
| Cyrtognatha | SP12         | 00787269  | Hispaniola  | 19.05116 | -70.88866 |          |          |
| Cyrtognatha | atopica GB   | N/A       | N/A         | N/A      | N/A       | GU129638 |          |
| Cyrtognatha | sp. GB       | N/A       | N/A         | N/A      | N/A       | GU129629 |          |
| Cyrtognatha | sp. GB       | N/A       | Panama      | N/A      | N/A       | GU129630 | GU129609 |
| Cyrtognatha | sp. GB       | N/A       | Panama      | N/A      | N/A       | GU129629 |          |
| Arkys       | cornutus GB  | N/A       | N/A         | N/A      | N/A       | FJ607556 | KY016938 |
| Chrysometa  | linguiformis | 00784514  | Cuba        | 22.56010 | -83.83318 |          |          |
| Leucauge    | argyra       | 00782551  | Hispaniola  | 19.35504 | -70.11100 |          |          |
| Metellina   | mengei GB    | N/A       | N/A         | N/A      | N/A       | KY269213 |          |
| Pachygnatha | degeeri GB   | N/A       | N/A         | N/A      | N/A       | KY268868 |          |

Tetragnatha      elongata      00001397A      Florida, USA      29.61958      -82.30660

**Figure 1**

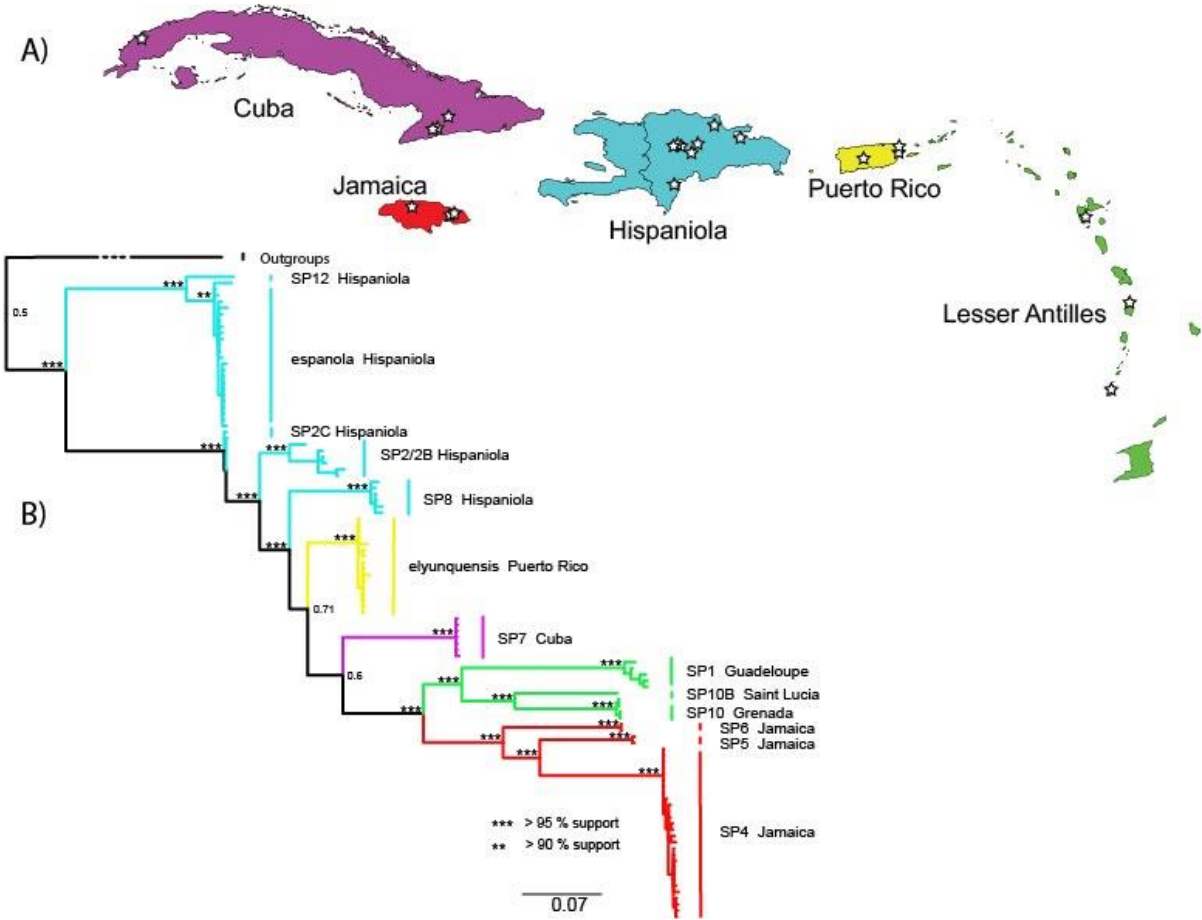

Figure 2

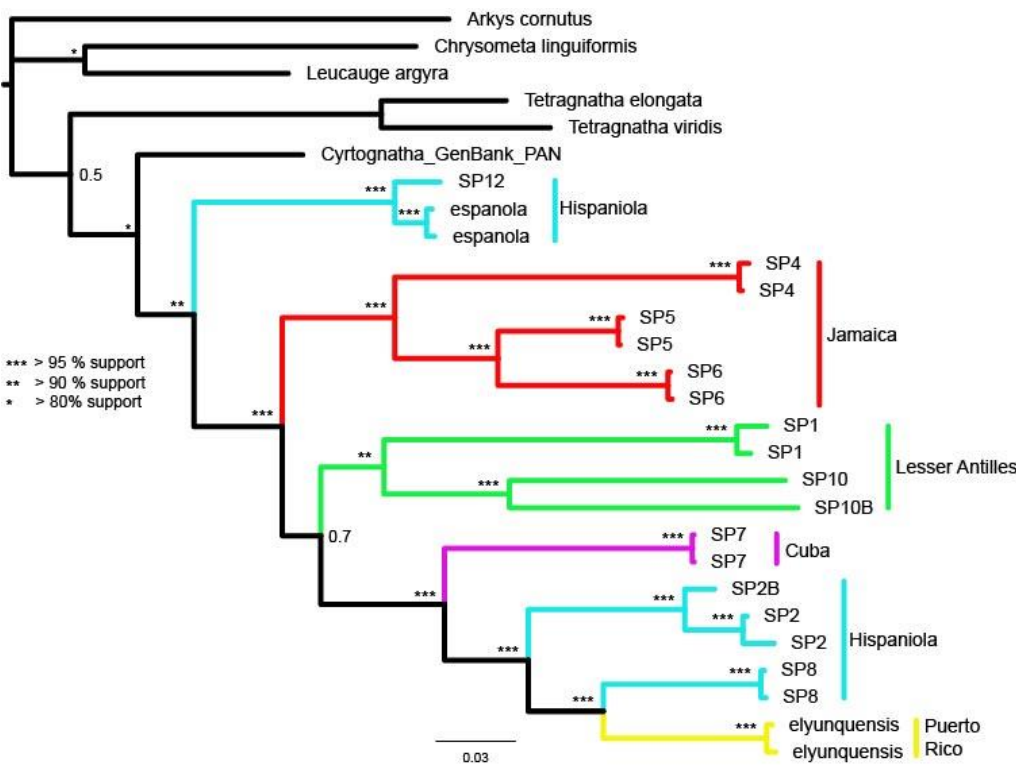

Figure 3

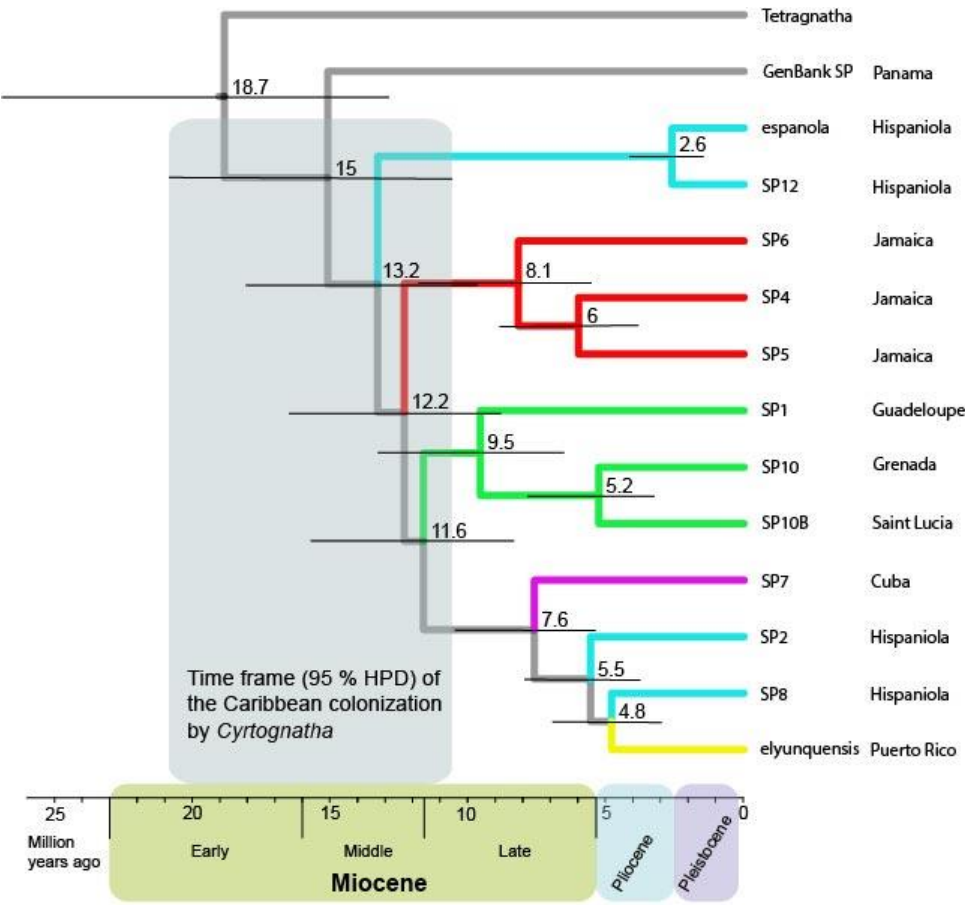

**Figure 4**

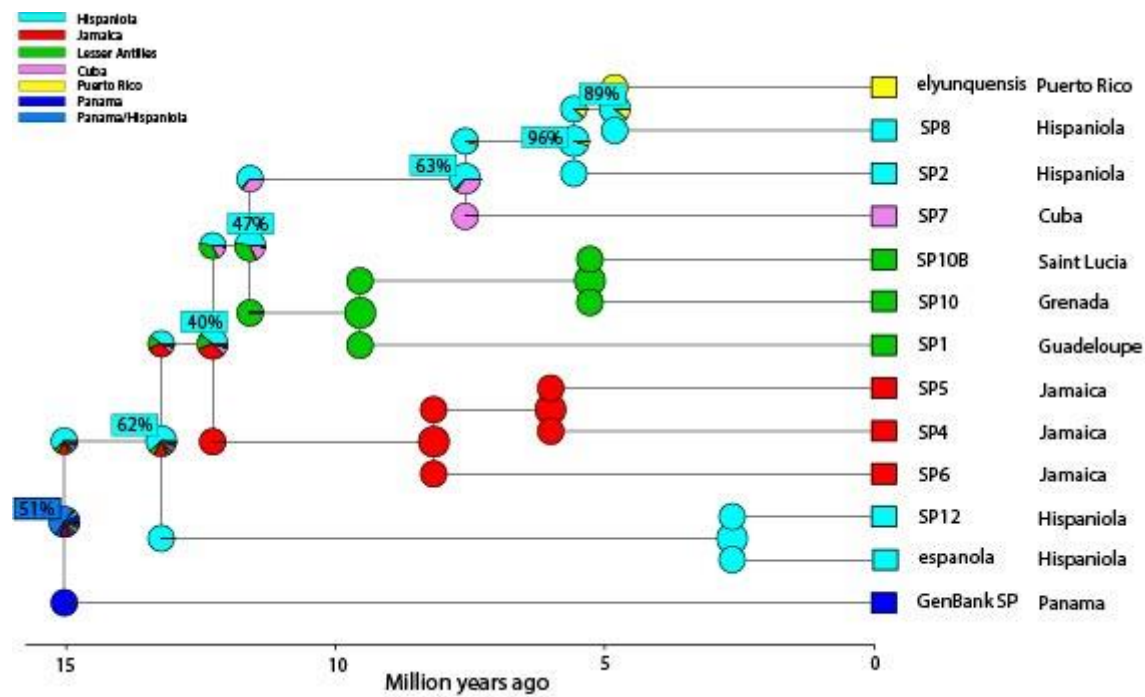

Source: http://biorxiv.org/content/10.1101/372979v1.full.pdf
